# Supplementary material for: BitterSweet: Building machine learning models for predicting the bitter and sweet taste of small molecules
Source: PubMed Central journal article supplement (PMC6509165; doi:10.1038/s41598-019-43664-y), 2019-05-09
Supplement: 41598_2019_43664_MOESM1_ESM.pdf [file 41598_2019_43664_MOESM1_ESM.pdf]

## SUPPLEMENTARY DATA

**BitterSweet: Building machine learning models for predicting the bitter and sweet taste of small molecules.**

**Rudraksh Tuwani, Somin Wadhwa & Ganesh Bagler\***

Complex Systems Laboratory, Center for Computational Biology, Indraprastha Institute of Information Technology (IIIT-Delhi), New Delhi, India

\*Corresponding Author ([ganesh.bagler@gmail.com](mailto:ganesh.bagler@gmail.com), [bagler@iiitd.ac.in](mailto:bagler@iiitd.ac.in))

**Supplementary Figure S1: Percentage of variation captured by the top 10 principal components in Dragon2D, Dragon2D/3D, Canvas, and ChemoPy molecular descriptor sets, for (a) sweet/non-sweet and (b) bitter/non-bitter prediction datasets.**

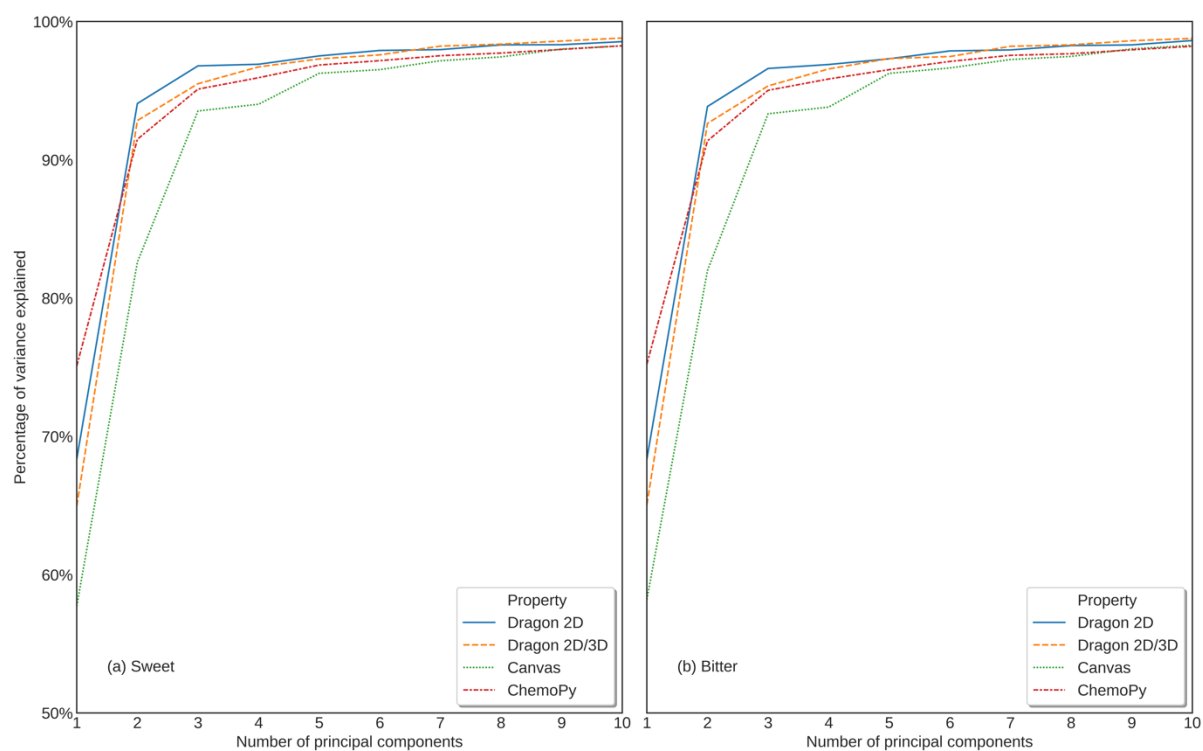

**Supplementary Figure S2: Boxplot of importance scores of different ChemoPy descriptors for (a) sweet/non-sweet and (b) bitter/non-bitter prediction.**

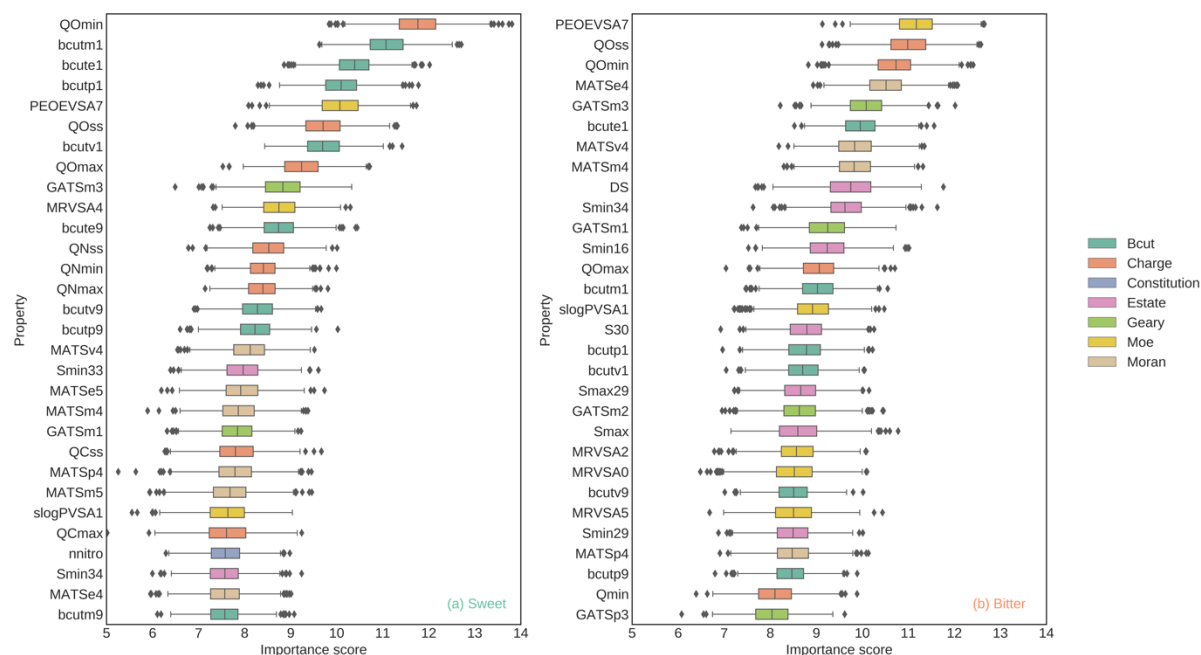

**Supplementary Figure S3: Boxplot of importance scores of different Dragon 2D/3D molecular descriptors for (a) sweet/non-sweet and (b) bitter/non-bitter prediction.**

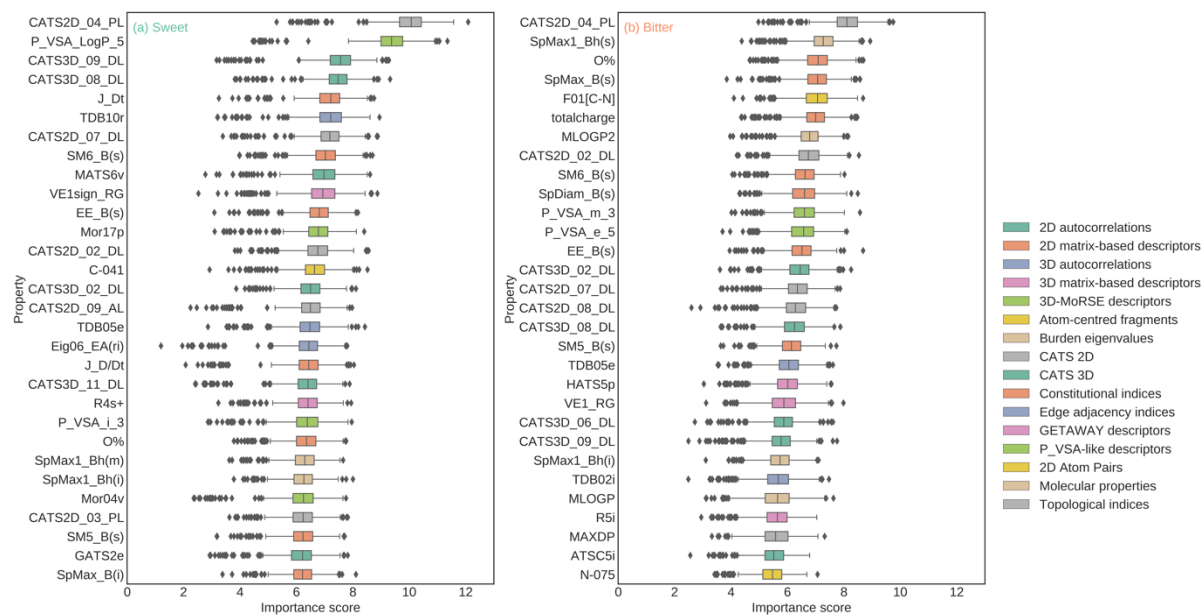

**Supplementary Figure S4: Boxplot of importance scores of different Canvas features for (a) sweet/non-sweet and (b) bitter/non-bitter prediction.**

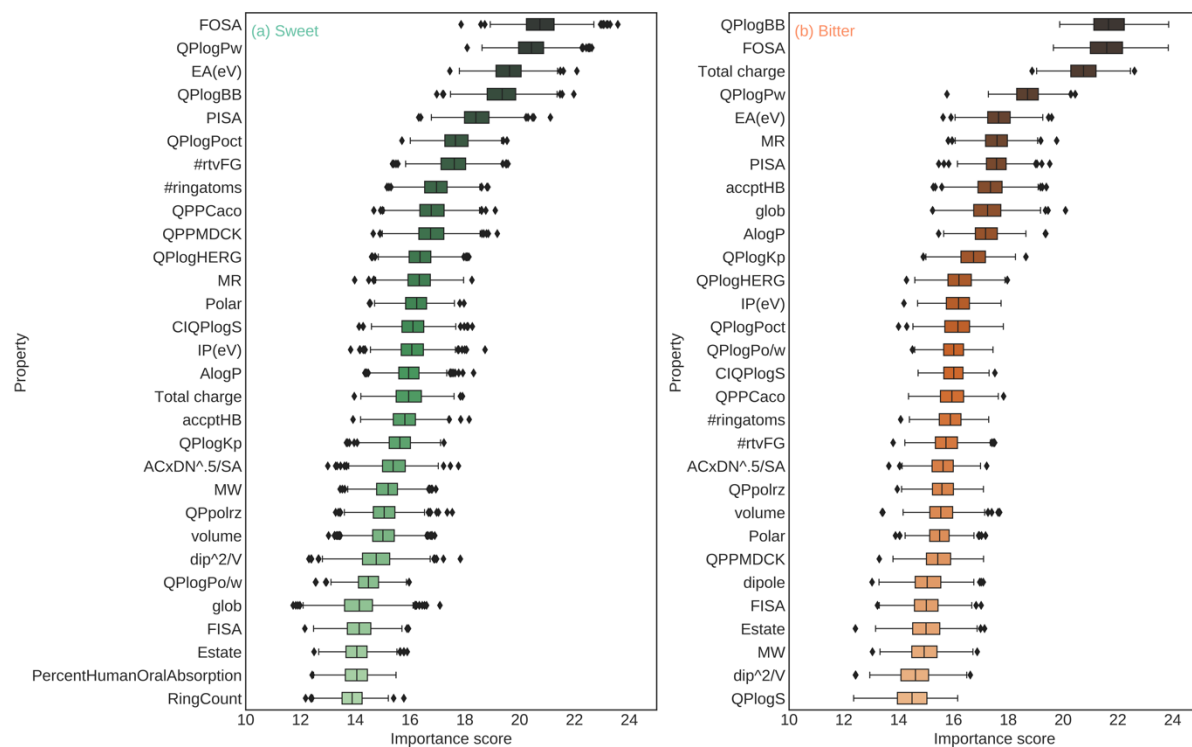

**Supplementary Figure S5: Proportion of compounds predicted to be (a) bitter and (b) sweet in specialized chemical sets at different thresholds.**

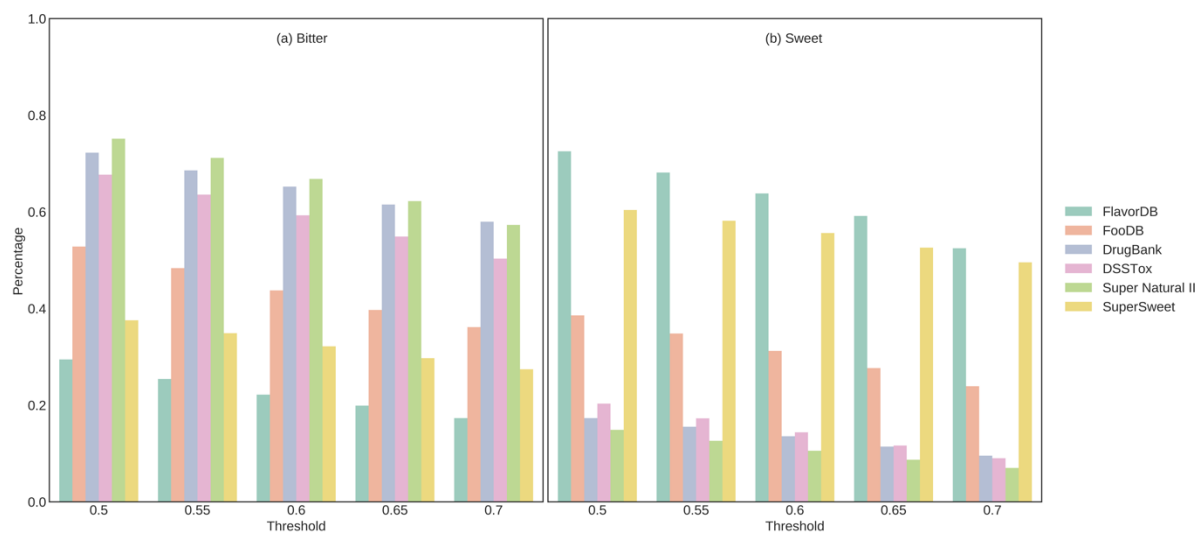

**Supplementary Figure S6: Proportion of compounds predicted to be both bitter and sweet in specialized chemical sets at different thresholds.**

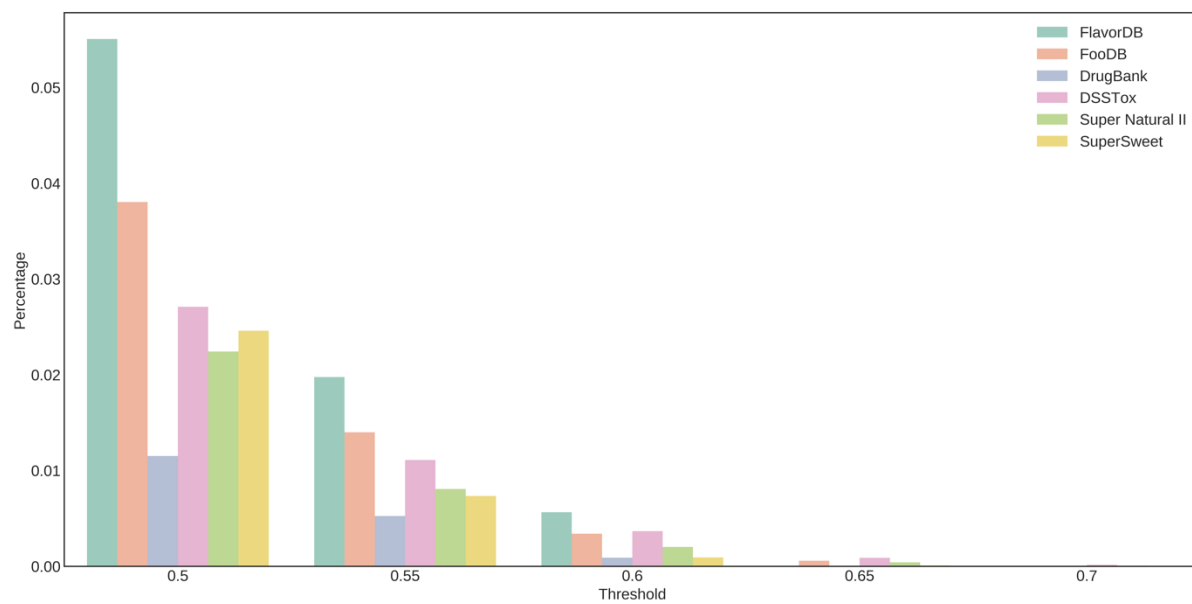

**Supplementary Table S1: Number of molecules in training and testing sets for bitter/non-bitter and sweet/non-sweet prediction.**

|        | Type     | Taste      | Number of molecules |
|--------|----------|------------|---------------------|
| Bitter | Training | Bitter     | 813                 |
|        |          | Non-bitter | 1444                |
|        | Testing  | Bitter     | 95                  |
|        |          | Non-bitter | 59                  |
| Sweet  | Training | Sweet      | 1139                |
|        |          | Non-sweet  | 1066                |
|        | Testing  | Non-sweet  | 53                  |
|        |          | Sweet      | 108                 |

**Supplementary Table S2: Summary of the different feature sets for building bitter-sweet prediction models.**

| Software | Description                                                                               |
|----------|-------------------------------------------------------------------------------------------|
| Canvas   | Physicochemical and ADMET (absorption, distribution, metabolism, excretion, and toxicity) |
| Dragon 7 | Extended Connectivity Fingerprints                                                        |
|          | 2D Molecular Descriptors                                                                  |
|          | 2D/3D Molecular Descriptors                                                               |
| ChemoPy  | 2D Topological and Structural Features                                                    |

**Supplementary Table S3: Performance of BitterSweet models for sweet/non-sweet prediction.**

| Performance Metrics   |       |                | Cross-Validation |       |       |        |       |       | Test  |       |       |        |       |       |
|-----------------------|-------|----------------|------------------|-------|-------|--------|-------|-------|-------|-------|-------|--------|-------|-------|
| Molecular Descriptors | Model | Pre-processing | AUPR             | AUROC | F1    | NER    | Sn    | Sp    | AUPR  | AUROC | F1    | NER    | Sn    | Sp    |
| Canvas                | RF    | Boruta         | 0.919            | 0.910 | 0.832 | 0.8380 | 0.823 | 0.853 | 0.899 | 0.816 | 0.754 | 0.7735 | 0.629 | 0.918 |
|                       | RLR   | Boruta         | 0.789            | 0.801 | 0.758 | 0.7510 | 0.759 | 0.743 | 0.882 | 0.789 | 0.783 | 0.7505 | 0.705 | 0.796 |
|                       | AB    | Boruta         | 0.895            | 0.895 | 0.826 | 0.8350 | 0.794 | 0.876 | 0.900 | 0.837 | 0.791 | 0.7710 | 0.705 | 0.837 |
| Dragon2D              | RF    | PCA            | 0.923            | 0.919 | 0.841 | 0.8480 | 0.827 | 0.869 | 0.924 | 0.839 | 0.720 | 0.7740 | 0.567 | 0.981 |
|                       | RLR   | PCA            | 0.881            | 0.891 | 0.829 | 0.8265 | 0.836 | 0.817 | 0.918 | 0.832 | 0.747 | 0.7655 | 0.625 | 0.906 |
|                       | AB    | PCA            | 0.901            | 0.895 | 0.820 | 0.8305 | 0.802 | 0.859 | 0.928 | 0.851 | 0.806 | 0.7755 | 0.740 | 0.811 |
|                       | RF    | Boruta         | 0.924            | 0.923 | 0.847 | 0.8510 | 0.835 | 0.867 | 0.933 | 0.863 | 0.798 | 0.8130 | 0.683 | 0.943 |
|                       | RLR   | Boruta         | 0.872            | 0.880 | 0.824 | 0.8230 | 0.837 | 0.809 | 0.911 | 0.812 | 0.761 | 0.7750 | 0.644 | 0.906 |
|                       | AB    | Boruta         | 0.923            | 0.918 | 0.848 | 0.8515 | 0.832 | 0.871 | 0.944 | 0.881 | 0.829 | 0.7995 | 0.769 | 0.830 |
| Dragon2D/3D           | RF    | PCA            | 0.925            | 0.916 | 0.849 | 0.8505 | 0.840 | 0.861 | 0.930 | 0.843 | 0.809 | 0.7905 | 0.724 | 0.857 |
|                       | RLR   | PCA            | 0.889            | 0.896 | 0.845 | 0.8365 | 0.851 | 0.822 | 0.918 | 0.831 | 0.804 | 0.8015 | 0.705 | 0.898 |
|                       | AB    | PCA            | 0.906            | 0.900 | 0.819 | 0.8355 | 0.769 | 0.902 | 0.932 | 0.845 | 0.770 | 0.7985 | 0.638 | 0.959 |
|                       | RF    | Boruta         | 0.929            | 0.921 | 0.853 | 0.8505 | 0.849 | 0.852 | 0.945 | 0.872 | 0.798 | 0.8175 | 0.676 | 0.959 |
|                       | RLR   | Boruta         | 0.842            | 0.842 | 0.786 | 0.7805 | 0.800 | 0.761 | 0.892 | 0.789 | 0.757 | 0.7680 | 0.638 | 0.898 |
|                       | AB    | Boruta         | 0.920            | 0.918 | 0.858 | 0.8560 | 0.853 | 0.859 | 0.950 | 0.883 | 0.856 | 0.8340 | 0.790 | 0.878 |
| ChemoPy               | RF    | PCA            | 0.918            | 0.914 | 0.839 | 0.8460 | 0.819 | 0.873 | 0.925 | 0.835 | 0.731 | 0.7660 | 0.592 | 0.940 |
|                       | RLR   | PCA            | 0.864            | 0.868 | 0.796 | 0.7950 | 0.802 | 0.788 | 0.887 | 0.802 | 0.791 | 0.7590 | 0.718 | 0.800 |
|                       | AB    | PCA            | 0.894            | 0.892 | 0.801 | 0.8230 | 0.737 | 0.909 | 0.910 | 0.809 | 0.762 | 0.7450 | 0.670 | 0.820 |
|                       | RF    | Boruta         | 0.925            | 0.922 | 0.842 | 0.8495 | 0.829 | 0.870 | 0.933 | 0.852 | 0.772 | 0.8005 | 0.641 | 0.960 |
|                       | RLR   | Boruta         | 0.840            | 0.852 | 0.788 | 0.7875 | 0.792 | 0.783 | 0.877 | 0.786 | 0.754 | 0.7605 | 0.641 | 0.880 |
|                       | AB    | Boruta         | 0.907            | 0.906 | 0.819 | 0.8315 | 0.797 | 0.866 | 0.926 | 0.838 | 0.753 | 0.7805 | 0.621 | 0.940 |
| ECFP                  | RF    | None           | 0.930            | 0.929 | 0.862 | 0.8630 | 0.869 | 0.857 | 0.927 | 0.837 | 0.763 | 0.8020 | 0.623 | 0.981 |
|                       | RLR   | None           | 0.895            | 0.889 | 0.815 | 0.8160 | 0.813 | 0.819 | 0.889 | 0.760 | 0.699 | 0.7545 | 0.547 | 0.962 |
|                       | AB    | None           | 0.923            | 0.926 | 0.867 | 0.8675 | 0.863 | 0.872 | 0.929 | 0.847 | 0.806 | 0.7875 | 0.726 | 0.849 |

**Supplementary Table S4: Performance of BitterSweet models for bitter/non-bitter prediction aggregated over different test sets.**

| Performance Metrics   |       |                | Cross-Validation |       |       |        |       |       | Test  |       |       |        |       |       |
|-----------------------|-------|----------------|------------------|-------|-------|--------|-------|-------|-------|-------|-------|--------|-------|-------|
| Molecular Descriptors | Model | Pre-processing | AUPR             | AUROC | F1    | NER    | Sn    | Sp    | AUPR  | AUROC | F1    | NER    | Sn    | Sp    |
| Canvas                | RF    | Boruta         | 0.774            | 0.840 | 0.708 | 0.7635 | 0.728 | 0.799 | 0.908 | 0.864 | 0.824 | 0.7865 | 0.800 | 0.773 |

|             |     |        |       |       |       |        |       |       |       |       |       |        |       |       |
|-------------|-----|--------|-------|-------|-------|--------|-------|-------|-------|-------|-------|--------|-------|-------|
| Dragon2D    | RLR | Boruta | 0.617 | 0.709 | 0.595 | 0.6670 | 0.694 | 0.640 | 0.819 | 0.740 | 0.737 | 0.6620 | 0.733 | 0.591 |
|             | AB  | Boruta | 0.804 | 0.849 | 0.722 | 0.7830 | 0.739 | 0.827 | 0.907 | 0.866 | 0.824 | 0.7995 | 0.781 | 0.818 |
|             | RF  | PCA    | 0.805 | 0.855 | 0.715 | 0.7630 | 0.727 | 0.799 | 0.911 | 0.857 | 0.813 | 0.7535 | 0.825 | 0.682 |
|             | RLR | PCA    | 0.781 | 0.847 | 0.722 | 0.7735 | 0.797 | 0.750 | 0.915 | 0.850 | 0.817 | 0.8025 | 0.757 | 0.848 |
|             | AB  | PCA    | 0.805 | 0.863 | 0.737 | 0.7915 | 0.723 | 0.860 | 0.912 | 0.868 | 0.849 | 0.7930 | 0.874 | 0.712 |
|             | RF  | Boruta | 0.814 | 0.864 | 0.747 | 0.7925 | 0.787 | 0.798 | 0.907 | 0.855 | 0.830 | 0.7970 | 0.806 | 0.788 |
| Dragon2D/3D | RLR | Boruta | 0.774 | 0.825 | 0.697 | 0.7505 | 0.758 | 0.743 | 0.909 | 0.836 | 0.816 | 0.7900 | 0.777 | 0.803 |
|             | AB  | Boruta | 0.812 | 0.860 | 0.745 | 0.7920 | 0.778 | 0.806 | 0.908 | 0.882 | 0.837 | 0.7990 | 0.825 | 0.773 |
|             | RF  | PCA    | 0.808 | 0.857 | 0.706 | 0.7670 | 0.696 | 0.838 | 0.919 | 0.874 | 0.869 | 0.8055 | 0.914 | 0.697 |
|             | RLR | PCA    | 0.797 | 0.862 | 0.739 | 0.8020 | 0.831 | 0.773 | 0.909 | 0.845 | 0.833 | 0.7695 | 0.857 | 0.682 |
|             | AB  | PCA    | 0.738 | 0.787 | 0.645 | 0.7255 | 0.626 | 0.825 | 0.909 | 0.851 | 0.842 | 0.7980 | 0.838 | 0.758 |
|             | RF  | Boruta | 0.784 | 0.851 | 0.726 | 0.7815 | 0.753 | 0.810 | 0.904 | 0.853 | 0.833 | 0.7855 | 0.829 | 0.742 |
| ChemoPy     | RLR | Boruta | 0.770 | 0.840 | 0.680 | 0.7530 | 0.773 | 0.733 | 0.902 | 0.844 | 0.829 | 0.7780 | 0.829 | 0.727 |
|             | AB  | Boruta | 0.782 | 0.854 | 0.714 | 0.7745 | 0.696 | 0.853 | 0.921 | 0.873 | 0.817 | 0.8110 | 0.743 | 0.879 |
|             | RF  | PCA    | 0.797 | 0.852 | 0.698 | 0.7540 | 0.719 | 0.789 | 0.927 | 0.880 | 0.838 | 0.8190 | 0.790 | 0.848 |
|             | RLR | PCA    | 0.743 | 0.821 | 0.685 | 0.7505 | 0.756 | 0.745 | 0.931 | 0.884 | 0.856 | 0.8180 | 0.848 | 0.788 |
|             | AB  | PCA    | 0.778 | 0.852 | 0.713 | 0.7775 | 0.705 | 0.850 | 0.909 | 0.869 | 0.833 | 0.7855 | 0.829 | 0.742 |
|             | RF  | Boruta | 0.803 | 0.852 | 0.725 | 0.7705 | 0.761 | 0.780 | 0.917 | 0.874 | 0.844 | 0.7950 | 0.848 | 0.742 |
| ECFP        | RLR | Boruta | 0.744 | 0.808 | 0.669 | 0.7310 | 0.751 | 0.711 | 0.905 | 0.846 | 0.818 | 0.7390 | 0.857 | 0.621 |
|             | AB  | Boruta | 0.786 | 0.850 | 0.716 | 0.7665 | 0.705 | 0.828 | 0.897 | 0.873 | 0.837 | 0.8065 | 0.810 | 0.803 |
|             | RF  | None   | 0.791 | 0.837 | 0.668 | 0.7240 | 0.614 | 0.834 | 0.906 | 0.861 | 0.850 | 0.7870 | 0.892 | 0.682 |
|             | RLR | None   | 0.757 | 0.815 | 0.693 | 0.7430 | 0.810 | 0.676 | 0.846 | 0.789 | 0.840 | 0.7615 | 0.902 | 0.621 |
|             | AB  | None   | 0.823 | 0.860 | 0.721 | 0.7725 | 0.762 | 0.783 | 0.926 | 0.892 | 0.846 | 0.8055 | 0.838 | 0.773 |

**Supplementary Table S5: Performance of BitterSweet models for bitter/non-bitter prediction on the Phyto-Dictionary test set.**

| Molecular Descriptors | Model | Pre-processing | Sn    | Sp   | F1    | AUPR  | AUROC |
|-----------------------|-------|----------------|-------|------|-------|-------|-------|
| Canvas                | RF    | Boruta         | 0.980 | 0.76 | 0.932 | 0.959 | 0.931 |
|                       | RLR   | Boruta         | 0.776 | 0.76 | 0.817 | 0.939 | 0.913 |
|                       | AB    | Boruta         | 0.939 | 0.76 | 0.911 | 0.935 | 0.968 |
| Dragon2D              | RF    | PCA            | 0.979 | 0.76 | 0.931 | 0.985 | 0.972 |
|                       | RLR   | PCA            | 0.979 | 0.64 | 0.904 | 0.971 | 0.884 |
|                       | AB    | PCA            | 0.979 | 0.84 | 0.949 | 0.989 | 0.979 |
|                       | RF    | Boruta         | 0.958 | 0.84 | 0.939 | 0.971 | 0.951 |
|                       | RLR   | Boruta         | 0.938 | 0.68 | 0.891 | 0.947 | 0.898 |
|                       | AB    | Boruta         | 0.979 | 0.76 | 0.931 | 0.978 | 0.959 |
| Dragon2D/3D           | RF    | PCA            | 0.980 | 0.68 | 0.914 | 0.976 | 0.946 |
|                       | RLR   | PCA            | 0.959 | 0.56 | 0.879 | 0.950 | 0.886 |
|                       | AB    | PCA            | 0.939 | 0.80 | 0.920 | 0.982 | 0.953 |
|                       | RF    | Boruta         | 0.959 | 0.76 | 0.922 | 0.962 | 0.931 |
|                       | RLR   | Boruta         | 0.980 | 0.68 | 0.914 | 0.952 | 0.913 |
|                       | AB    | Boruta         | 0.959 | 0.88 | 0.949 | 0.985 | 0.968 |
| ChemoPy               | RF    | PCA            | 0.959 | 0.92 | 0.959 | 0.988 | 0.972 |
|                       | RLR   | PCA            | 0.939 | 0.56 | 0.868 | 0.944 | 0.884 |
|                       | AB    | PCA            | 0.959 | 0.92 | 0.959 | 0.990 | 0.979 |
|                       | RF    | Boruta         | 0.959 | 0.84 | 0.940 | 0.975 | 0.951 |
|                       | RLR   | Boruta         | 0.898 | 0.68 | 0.871 | 0.952 | 0.898 |
|                       | AB    | Boruta         | 0.959 | 0.88 | 0.949 | 0.980 | 0.959 |
| ECFP                  | RF    | None           | 0.979 | 0.84 | 0.949 | 0.972 | 0.946 |
|                       | RLR   | None           | 0.958 | 0.64 | 0.893 | 0.937 | 0.886 |
|                       | AB    | None           | 0.959 | 0.84 | 0.940 | 0.970 | 0.953 |

**Supplementary Table S6: Performance of BitterSweet models for bitter/non-bitter prediction on the UNIMI test set.**

| Molecular Descriptors | Model | Pre-processing | Sn    | Sp    | F1    | AUPR  | AUROC |
|-----------------------|-------|----------------|-------|-------|-------|-------|-------|
| Canvas                | RF    | Boruta         | 0.826 | 0.727 | 0.745 | 0.810 | 0.845 |
|                       | RLR   | Boruta         | 0.870 | 0.364 | 0.625 | 0.626 | 0.664 |
|                       | AB    | Boruta         | 0.739 | 0.818 | 0.739 | 0.844 | 0.875 |
| Dragon2D              | RF    | PCA            | 0.826 | 0.576 | 0.679 | 0.667 | 0.794 |
|                       | RLR   | PCA            | 0.609 | 0.970 | 0.737 | 0.848 | 0.842 |
|                       | AB    | PCA            | 0.783 | 0.667 | 0.692 | 0.557 | 0.741 |
|                       | RF    | Boruta         | 0.783 | 0.727 | 0.720 | 0.695 | 0.814 |
|                       | RLR   | Boruta         | 0.696 | 0.879 | 0.744 | 0.854 | 0.856 |
|                       | AB    | Boruta         | 0.739 | 0.758 | 0.708 | 0.772 | 0.829 |
| Dragon2D/3D           | RF    | PCA            | 0.913 | 0.636 | 0.750 | 0.687 | 0.817 |
|                       | RLR   | PCA            | 0.826 | 0.424 | 0.623 | 0.659 | 0.740 |
|                       | AB    | PCA            | 0.783 | 0.818 | 0.766 | 0.850 | 0.888 |
|                       | RF    | Boruta         | 0.826 | 0.697 | 0.731 | 0.690 | 0.802 |
|                       | RLR   | Boruta         | 0.913 | 0.727 | 0.792 | 0.844 | 0.896 |
|                       | AB    | Boruta         | 0.565 | 0.879 | 0.650 | 0.768 | 0.830 |

|         |     |        |       |       |       |       |       |
|---------|-----|--------|-------|-------|-------|-------|-------|
| ChemoPy | RF  | PCA    | 0.478 | 0.848 | 0.564 | 0.694 | 0.790 |
|         | RLR | PCA    | 0.957 | 0.515 | 0.721 | 0.797 | 0.840 |
|         | AB  | PCA    | 0.913 | 0.545 | 0.712 | 0.634 | 0.727 |
|         | RF  | Boruta | 0.957 | 0.636 | 0.772 | 0.716 | 0.829 |
|         | RLR | Boruta | 1.000 | 0.515 | 0.742 | 0.774 | 0.831 |
|         | AB  | Boruta | 0.739 | 0.727 | 0.694 | 0.741 | 0.829 |
| ECFP    | RF  | None   | 0.957 | 0.515 | 0.721 | 0.590 | 0.711 |
|         | RLR | None   | 1.000 | 0.515 | 0.742 | 0.547 | 0.688 |
|         | AB  | None   | 0.913 | 0.697 | 0.778 | 0.783 | 0.848 |

**Supplementary Table S7: Performance of BitterSweet models for bitter/non-bitter prediction on the Bitter-New test set.**

| Molecular Descriptors | Model | Pre-processing | Sn    | Sp | F1    | AUPR | AUROC |
|-----------------------|-------|----------------|-------|----|-------|------|-------|
| Canvas                | RF    | Boruta         | 0.652 | -  | 0.789 | 1.0  | -     |
|                       | RLR   | Boruta         | 0.565 | -  | 0.722 | 1.0  | -     |
|                       | AB    | Boruta         | 0.783 | -  | 0.878 | 1.0  | -     |
| Dragon2D              | RF    | PCA            | 0.652 | -  | 0.789 | 1.0  | -     |
|                       | RLR   | PCA            | 0.609 | -  | 0.757 | 1.0  | -     |
|                       | AB    | PCA            | 0.739 | -  | 0.850 | 1.0  | -     |
|                       | RF    | Boruta         | 0.652 | -  | 0.789 | 1.0  | -     |
|                       | RLR   | Boruta         | 0.652 | -  | 0.789 | 1.0  | -     |
|                       | AB    | Boruta         | 0.696 | -  | 0.821 | 1.0  | -     |
| Dragon2D/3D           | RF    | PCA            | 0.913 | -  | 0.955 | 1.0  | -     |
|                       | RLR   | PCA            | 0.739 | -  | 0.850 | 1.0  | -     |
|                       | AB    | PCA            | 0.565 | -  | 0.722 | 1.0  | -     |
|                       | RF    | Boruta         | 0.739 | -  | 0.850 | 1.0  | -     |
|                       | RLR   | Boruta         | 0.652 | -  | 0.789 | 1.0  | -     |
|                       | AB    | Boruta         | 0.652 | -  | 0.789 | 1.0  | -     |
| ChemoPy               | RF    | PCA            | 0.565 | -  | 0.722 | 1.0  | -     |
|                       | RLR   | PCA            | 0.826 | -  | 0.905 | 1.0  | -     |
|                       | AB    | PCA            | 0.652 | -  | 0.789 | 1.0  | -     |
|                       | RF    | Boruta         | 0.652 | -  | 0.789 | 1.0  | -     |
|                       | RLR   | Boruta         | 0.696 | -  | 0.821 | 1.0  | -     |
|                       | AB    | Boruta         | 0.696 | -  | 0.821 | 1.0  | -     |
| ECFP                  | RF    | None           | 0.739 | -  | 0.850 | 1.0  | -     |
|                       | RLR   | None           | 0.826 | -  | 0.905 | 1.0  | -     |
|                       | AB    | None           | 0.652 | -  | 0.789 | 1.0  | -     |
